# Supplementary material for: Selective synthesis of thioethers in the presence of a transition-metal-free solid Lewis acid
Source: publisher site journal article supplement (doi:10.3762/bjoc.12.259), 2016-12-06
Supplement: Additional file 1 [file 1860-5397-12-259-S1.pdf]

## **Supporting Information**

for

# **Selective synthesis of thioethers in the presence of a transition metal free solid Lewis acid**

Federica Santoro, Matteo Mariani, Federica Zaccheria, Rinaldo Psaro and Nicoletta Ravasio\*

Address: CNR ISTM, via C. Golgi 19, 20133 Milano, Italy

Email: Nicoletta Ravasio – [n.ravasio@istm.cnr.it](mailto:n.ravasio@istm.cnr.it)

\* Corresponding author

## **Experimental, NMR analysis and copies of spectra**

## Table of Contents

|                                                                                             |     |
|---------------------------------------------------------------------------------------------|-----|
| Materials                                                                                   | S3  |
| Experimental procedure for S-alkylation reactions and some results                          | S3  |
| Attribution of $^1\text{H}$ NMR and $^{13}\text{C}$ NMR signals for some selected compounds | S7  |
| Copies of $^1\text{H}$ NMR and $^{13}\text{C}$ NMR spectra                                  | S12 |
| Copies of mass spectra                                                                      | S20 |
| Optical rotatory power determination                                                        | S24 |

## Materials

All the substrates were supplied by Sigma-Aldrich and used without any further manipulation. For the reactions carried out in solvent, toluene was supplied by Sigma-Aldrich and was used as received. The features and the suppliers of the supports and the copper catalysts are reported in Table S1.

Thermogravimetric analysis (TGA) to determine the surface hydroxy groups number was performed on Perkin Elmer 7 HT thermobalance. The analyses were performed by heating the sample from 50 °C to 1,000 °C with a temperature ramp of 5 °C/min. The water loss was evaluated in the range of 250–900 °C.

**Table S1:** Textural properties of solid acid catalysts.

| Solid acid catalyst                                  | Acronym  | Supplier      | Co-oxide loading (wt %) | BET (m <sup>2</sup> /g) | PV (mL/g) |
|------------------------------------------------------|----------|---------------|-------------------------|-------------------------|-----------|
| SiO <sub>2</sub> -Al <sub>2</sub> O <sub>3</sub> 0.6 | SiAl 0.6 | Grace Davison | 0.6                     | 488                     | 1.43      |
| SiO <sub>2</sub> -Al <sub>2</sub> O <sub>3</sub> 135 | SiAl 13  | Sigma-Aldrich | 13                      | 485                     | 0.79      |
| SiO <sub>2</sub> -ZrO <sub>2</sub> 4.7               | SiZr 4.7 | Grace Davison | 4.7                     | 421                     | 2.38      |
| SiO <sub>2</sub> -TiO <sub>2</sub> 2.3               | SiTi 2.3 | Grace Davison | 2.3                     | 297                     | 1.26      |

## Experimental procedure for S-alkylation of alcohols in solvent

In a typical catalytic test, a mixture of alcohol (0.8 mmol) and thiol (0.8 mmol) were dissolved in toluene (8 mL), and the solution transferred under N<sub>2</sub> or atmospheric air into a glass reaction vessel in which the solid acid catalyst, if necessary, had been properly pretreated (100 mg). Reactions were carried out under atmospheric pressure of N<sub>2</sub> or atmospheric air and constant magnetic stirring (1000 rpm) by using a Teflon-coated magnetic stirring bar at the appropriate temperature (oil bath temperature). After reaction, the mixture has been decanted and the product and the catalyst filtered off by

a PTFE syringe filter. Solvent has been distilled under reduced pressure, and reaction mixtures were analyzed by GC–MS (5% phenylmethyl polysiloxane capillary column length 30 m, injection  $T = 60\text{ }^{\circ}\text{C}$ ) and by  $^1\text{H}$  NMR and  $^{13}\text{C}$  NMR spectroscopy. The NMR spectra reported below have been registered without any further purification.

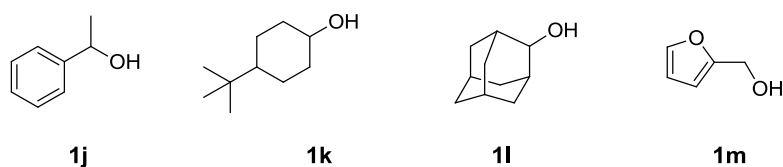

**Figure S1:** Structures of alcohols not discussed in the manuscript **1j-m**.

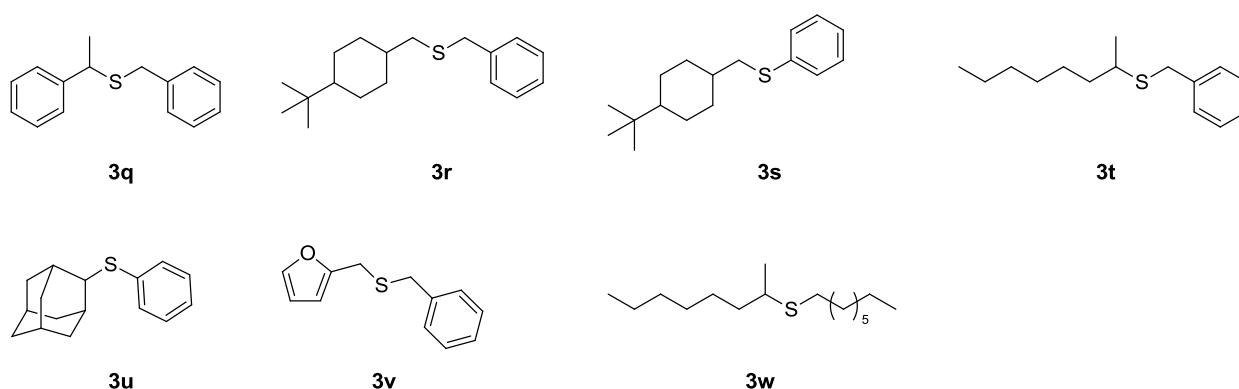

**Figure S2:** Structures of thioethers not discussed in the manuscript **3q-w**.

**Table S2:** Some results in the synthesis of thioethers from different alcohols and thiols promoted by SiAl 0.6 in solvent<sup>a</sup>.

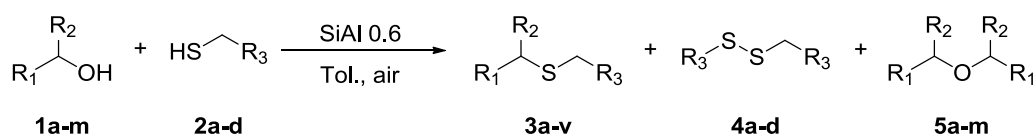

| Entry          | 1a-m | 2a-d | $T^b$<br>( $^{\circ}\text{C}$ ) | $t$<br>(h) | Conv.<br>(%) | 3a-v<br>(%) | 4a-d<br>(%) | 5a-m<br>(%) | Sel. Dehy. <sup>c</sup><br>(%) |
|----------------|------|------|---------------------------------|------------|--------------|-------------|-------------|-------------|--------------------------------|
| 1              | 1a   | 2a   | 60                              | 1          | >99.0        | >99.0       | –           | –           | –                              |
| 2 <sup>d</sup> | 1a   | 2a   |                                 |            |              | 3a          | 4a          | 5a          |                                |

|                |    |    |    |               |                      |                      |               |                     |              |
|----------------|----|----|----|---------------|----------------------|----------------------|---------------|---------------------|--------------|
|                |    |    | 60 | 1             | >99.0                | 90.8                 | 0.5           | 7.7                 | 1.0          |
| 3              | 1a | 2a | 80 | 0.5           | >99.0                | >99.0                | –             | –                   | <1.0         |
| 4 <sup>e</sup> | 1a | 2b | 60 | 5             | 16.1                 | –                    | 21.5          | 15.6                | 61.1         |
| 5              | 1a | 2b | 60 | 0.5<br>1      | 98.5<br>>99          | 82.0<br>94.7         | 1.0<br><1.0   | 13.3<br>1.7         | 3.7<br>3.2   |
| 6              | 1a | 2c | 60 | 0.5           | >99                  | >99                  | –             | –                   | –            |
| 7              | 1a | 2d | 60 | 0.5           | >99                  | >99                  | –             | –                   | –            |
| 8              | 1j | 2a | 60 | 0.5<br>5      | 5.1<br>8.3           | 0<br>0               | 44.4<br>13.2  | –<br>40.1           | 55.6<br>46.7 |
| 9              | 1j | 2a | 80 | 0.5<br>5      | 12.2<br>47.8         | 11.0<br>20.9         | 9.8<br>3.2    | 48.4<br>68.9        | 30.8<br>7.0  |
| 10             | 1c | 2a | 60 | 1<br>4        | 9.8<br>15.7          | 28.3<br>34.1         | 6.4<br>10.3   | 60.4<br>42.9        | –<br>–       |
| 11             | 1c | 2a | 80 | 0.5<br>1<br>2 | 59.8<br>78.4<br>94.3 | 60.0<br>85.6<br>96.8 | 2.8<br>–<br>– | 33.9<br>12.4<br>1.4 | –<br>–<br>–  |
| 12             | 1k | 2a | 60 | 6             | –                    | –                    | –             | –                   | –            |

|    |           |           |     |     |      |           |           |           |   |
|----|-----------|-----------|-----|-----|------|-----------|-----------|-----------|---|
| 13 | <b>1k</b> | <b>2a</b> | 80  | 7   | –    | <b>3r</b> | <b>4a</b> | <b>5k</b> | – |
| 14 | <b>1k</b> | <b>2b</b> | 110 | 8   | –    | <b>3s</b> | <b>4b</b> | <b>5k</b> | – |
| 15 | <b>1f</b> | <b>2a</b> | 110 | 24  | –    | <b>3t</b> | <b>4a</b> | <b>5f</b> | – |
| 16 | <b>1l</b> | <b>2b</b> | 110 | 12  | 10.6 | <b>3u</b> | <b>4b</b> | <b>5l</b> | – |
| 17 | <b>1m</b> | <b>2a</b> | 60  | 4   | –    | <b>3v</b> | <b>4a</b> | <b>5m</b> | – |
| 18 | <b>1m</b> | <b>2a</b> | 110 | 0.5 | –    | <b>3v</b> | <b>4a</b> | <b>5m</b> | – |

<sup>a</sup>Reaction conditions: Cat.=100mg, Cat./ROH=1:1 (w/w), ROH/RSH=1:1(mol/mol), toluene (8 mL), air, stirring (1000 rpm); reaction mixtures were analysed by GC–MS (5% phenylmethyl polysiloxane capillary column length 30 m, injection  $T = 60\text{ }^{\circ}\text{C}$ ), and by  $^1\text{H}$  NMR and  $^{13}\text{C}$  NMR spectroscopy; conversion was calculated with respect to the thiol. <sup>b</sup>Oil bath temperature. <sup>c</sup>Corresponding substituted styrene derived from alcohol dehydration. <sup>d</sup>Reaction with cat./ROH = 1:2 (w/w). <sup>e</sup>Reaction without catalyst.

## Experimental procedure for S-alkylation of alcohols without solvent

In a typical reaction the alcohol (0.8 mmol) and the thiol (0.8 mmol) were introduced into a glass tube with a screw cap contained SiAl 0.6 (10 mg). Reactions were carried out under atmospheric air and constant magnetic stirring (1000 rpm) using a Teflon-coated magnetic stir bar at the chosen temperature (oil bath temperature). After reaction, the mixture has been decanted and the product and the catalyst filtered off by a PTFE syringe filter. Reaction mixtures were analysed by GC–MS (5% phenylmethyl polysiloxane capillary column length 30 m, injection  $T = 60\text{ }^{\circ}\text{C}$ ) and by  $^1\text{H}$  NMR and  $^{13}\text{C}$  NMR spectroscopy. The NMR spectra reported below have been registered without any

further purification. The product obtained from the addition of benzylmercaptan **2a** to cinnamyl alcohol **1i** has been identified by comparison with NMR spectra reported in the literature (Angew. Chem. Int. Ed. 2005, 44, 794–797).

### Attribution of $^1\text{H}$ NMR and $^{13}\text{C}$ NMR signals for some selected compounds

$^1\text{H}$  NMR and  $^{13}\text{C}$  NMR data were recorded on Bruker 300 MHz and 400 MHz spectrometers at ambient temperature.  $^1\text{H}$  NMR data are presented as follows: chemical shift in ppm relative to internal TMS (0.00 ppm) (multiplicity, coupling constant, integration). The following abbreviations are used in reporting NMR data: s, singlet; d, doublet; t, triplet; q, quartet; dd, doublet of doublets; m, multiplet.

$^{13}\text{C}$  NMR data are presented as follows: chemical shift in ppm relative to  $\text{CDCl}_3$  (77.0 ppm)

#### Compound 3a: benzyl(1-(4-methoxyphenyl)ethyl)sulfane

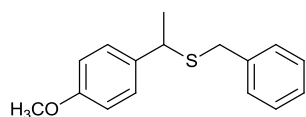

Pale yellow liquid.

$^1\text{H}$  NMR (300 MHz,  $\text{CDCl}_3$ ,  $\delta$  ppm): 7.37 – 7.20 (m, 7H), 6.97-6.81 (m, 2H), 3.87-3.76 (m, 4H), 3.65-3.42 (m, 2H), 1.54 (d,  $J = 7.1$  Hz, 3H).

$^{13}\text{C}\{\text{H}\}$  APT NMR (75 MHz,  $\text{CDCl}_3$ ,  $\delta$  ppm): 159.0, 138.9, 136.2, 129.3, 128.9, 128.8, 127.2, 114.2, 55.7, 43.3, 36.0, 231.

$[\text{M}]^+$ :  $m/z$  calcd: 258.11 ; found: 258.1, 135.1, 120.0, 105.0, 91.0, 77.0, 65.0, 59.0.

**Compound 3b: (1-(4-methoxyphenyl)ethyl)(phenyl)sulfane**

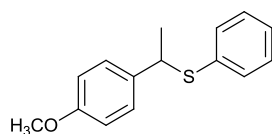

Colourless liquid

$^1\text{H}$  NMR (300 MHz,  $\text{CDCl}_3$ ,  $\delta$  ppm): 7.33 – 7.20 (m, 7H), 6.90 – 6.73 (m, 2H), 4.35 (q,  $J$  = 7.0 Hz, 1H), 3.81 (s, 3H), 1.63 (d,  $J$  = 7.0 Hz, 3H).

$^{13}\text{C}\{\text{H}\}$  APT NMR (75 MHz,  $\text{CDCl}_3$ ,  $\delta$  ppm): 159.0, 135.6, 132.9, 129.5, 129.1, 128.7, 127.4, 114.2, 55.6, 47.8, 22.8.

$[\text{M}]^+$ :  $m/z$  calcd: 244.09 ; found: 244.0, 135.0, 120.0, 105.0, 91.0.

Ref. Synthetic Communications<sup>1</sup>, 41: 100–112, 2011.

**Compound 3c: (1-(4-methoxyphenyl)ethyl)(naphthalen-2-yl)sulfane**

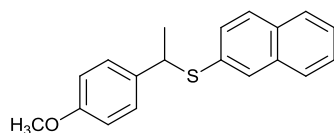

White solid

$^1\text{H}$  NMR (300 MHz,  $\text{CDCl}_3$ ,  $\delta$  ppm):  $\delta$  7.85-7.70 (m, 4H), 7.50 – 7.44 (m, 2H), 7.41 (dd,  $J$  = 8.6, 1.6 Hz, 1H), 7.29 (d,  $J$  = 8.6 Hz, 2H), 6.84 (d,  $J$  = 8.7 Hz, 2H), 4.48 (q,  $J$  = 7.0 Hz, 1H), 3.80 (s, 3H), 1.68 (d,  $J$  = 7.0, 3H).

$^{13}\text{C}\{\text{H}\}$  APT NMR (75 MHz,  $\text{CDCl}_3$ ,  $\delta$  ppm): 159.1, 135.6, 134.0, 133.3, 132.7, 131.4, 130.2, 128.8, 128.5, 128.0, 127.8, 126.7, 126.4, 114.2, 55.7, 47.7, 22.9.

$[\text{M}]^+$ :  $m/z$  calcd: 294.11 ; found: 294.1, 160.0, 135.0, 128.1, 115.1, 102.1, 91.1, 79.1, 65.0.



**Compound 3d: cyclohexyl(1-(4-methoxyphenyl)ethyl)sulfane**

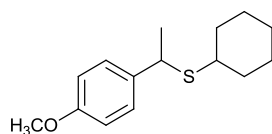

Pale yellow liquid

$^1\text{H}$  NMR (300 MHz,  $\text{CDCl}_3$ ,  $\delta$  ppm): 7.29 (d,  $J$  = 8.7 Hz, 2H), 6.86 (d,  $J$  = 8.7 Hz, 2H), 4.04 (q,  $J$  = 7.0 Hz, 1H), 3.82 (s, 3H), 2.57 – 2.29 (m, 1H), 1.98 (d,  $J$  = 12.7 Hz, 1H), 1.74 (s, 3H), 1.59 (dd,  $J$  = 29.4, 23.8 Hz, 5H), 1.29 – 0.86 (m, 4H).

$^{13}\text{C}\{\text{H}\}$  APT NMR (75 MHz,  $\text{CDCl}_3$ ,  $\delta$  ppm): 158.8, 137.2, 128.5, 114.2, 55.6, 43.1, 42.2, 34.3, 33.7, 26.4, 26.3, 23.6.

$[\text{M}]^+$ :  $m/z$  calcd: 250.14 ; found: 250.1, 135.0, 120.0, 105.0, 91.0.

**Compound 3e: benzyl(4-methoxybenzyl)sulfane**

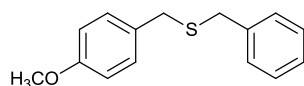

Colourless liquid

$^1\text{H}$  NMR (300 MHz,  $\text{CDCl}_3$ ,  $\delta$  ppm): 7.36 – 7.27 (m, 5H), 7.25 - 7.20 (m, 2H), 6.91 – 6.83 (m, 2H), 3.83 (s, 3H), 3.61 (d,  $J$  = 9.9 Hz, 4H).

$^{13}\text{C}\{\text{H}\}$  APT NMR (75 MHz,  $\text{CDCl}_3$ ,  $\delta$  ppm): 159.0, 138.7, 130.5, 129.4, 128.9, 127.3, 114.3, 55.7, 35.9, 35.4.

$[\text{M}]^+$ :  $m/z$  calcd: 244.09 ; found: 244.1, 121.0, 109.0, 91.0, 77.0, 65.0, 51.0.

Ref. *Chem. Eur. J.* **2009**, 15, 793 – 797

**Compound 3f: (1-(4-methoxyphenyl)ethyl)(octyl)sulfane**

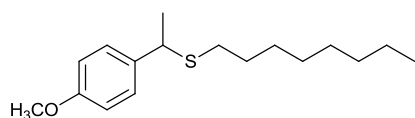

Colourless liquid

$^1\text{H}$  NMR (300 MHz,  $\text{CDCl}_3$ ,  $\delta$  ppm): 7.31 – 7.24 (m, 2H), 6.91 – 6.84 (m, 2H), 3.94 (q,  $J$  = 7.0 Hz, 1H), 3.82 (s, 3H), 2.41 – 2.21 (m, 2H), 1.61 – 1.43 (m, 5H), 1.41 – 1.23 (m, 10H), 0.90 (t,  $J$  = 6.8 Hz, 3H).

$^{13}\text{C}\{\text{H}\}$  ZGDC NMR (75 MHz,  $\text{CDCl}_3$ ,  $\delta$  ppm): 158.9, 136.7, 128.6, 114.2, 55.6, 43.8, 32.2, 31.7, 29.8, 29.6, 29.5, 29.4, 23.2, 23.0, 14.5.

$[\text{M}]^+$ :  $m/z$  calcd: 280.19 ; found: 280.1, 135.1, 120.0, 105.0, 91.0, 77.0, 65.0, 55.0.

**Compound 3h: benzyl(1-(*p*-tolyl)ethyl)sulfane**

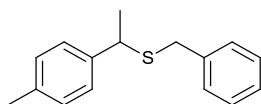

Pale yellow liquid

$^1\text{H}$  NMR (300 MHz,  $\text{CDCl}_3$ ,  $\delta$  ppm): 7.39 – 7.14 (m, 9H), 3.83 (q,  $J$  = 7.0 Hz, 1H), 3.53 (m, 2H), 2.39 (s, 3H), 1.56 (d,  $J$  = 7.1 Hz, 3H).

$^{13}\text{C}\{\text{H}\}$  APT NMR (75 MHz,  $\text{CDCl}_3$ ,  $\delta$  ppm): 141.2, 138.9, 137.1, 129.6, 129.3, 128.8, 127.8, 127.2, 43.7, 36.1, 23.0, 21.5.

$[\text{M}]^+$ :  $m/z$  calcd: 242.11; found: 242.1, 119.1, 103.0, 91.0, 77.0, 65.0, 59.0, 51.0.

**Compound 3j: benzyl(2-(*p*-tolyl)propan-2-yl)sulfane**

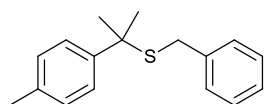

Colourless-pale yellow liquid

$^1\text{H}$  NMR (400 MHz,  $\text{CDCl}_3$ ,  $\delta$  ppm): 7.51 (d,  $J = 8.0$  Hz, 2H), 7.29 – 7.17 (m, 7H), 3.45 (s, 2H), 2.40 (s, 3H), 1.75 (s, 6H).

$^{13}\text{C}\{\text{H}\}$  APT NMR (100 MHz,  $\text{CDCl}_3$ ,  $\delta$  ppm): 143.3, 138.3, 136.1, 128.9, 128.9, 128.3, 126.7, 126.6, 111.6, 48.4, 34.6, 30.3, 20.96.

$[\text{M}]^+$ :  $m/z$  calcd: 256.13; found: 256.1, 133.1, 124.0, 117.0, 105.1, 91.0, 77.0, 65.0, 51.0.

Ref. *Chem. Commun.* **2016**, 52, 8291-8293.

# Copies of $^1\text{H}$ NMR and $^{13}\text{C}$ NMR spectra

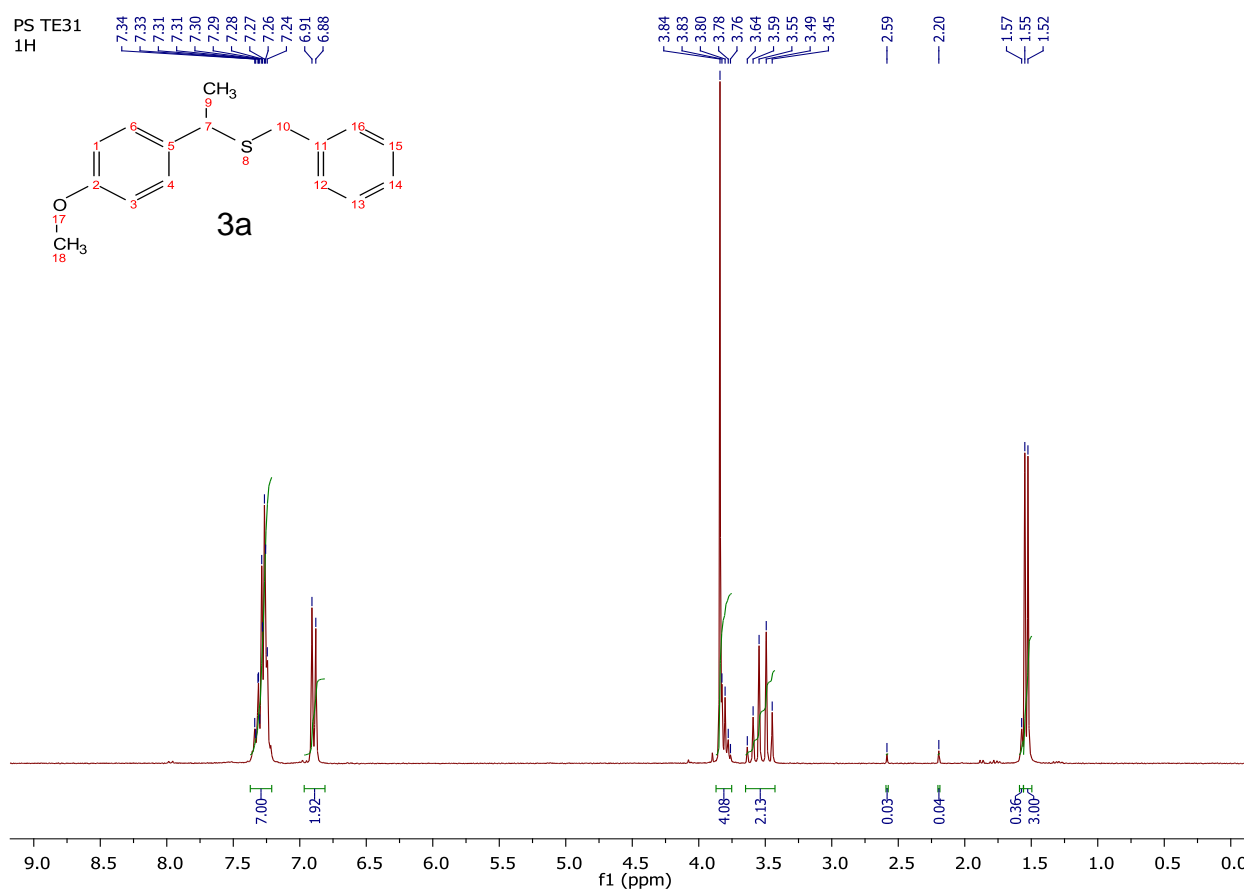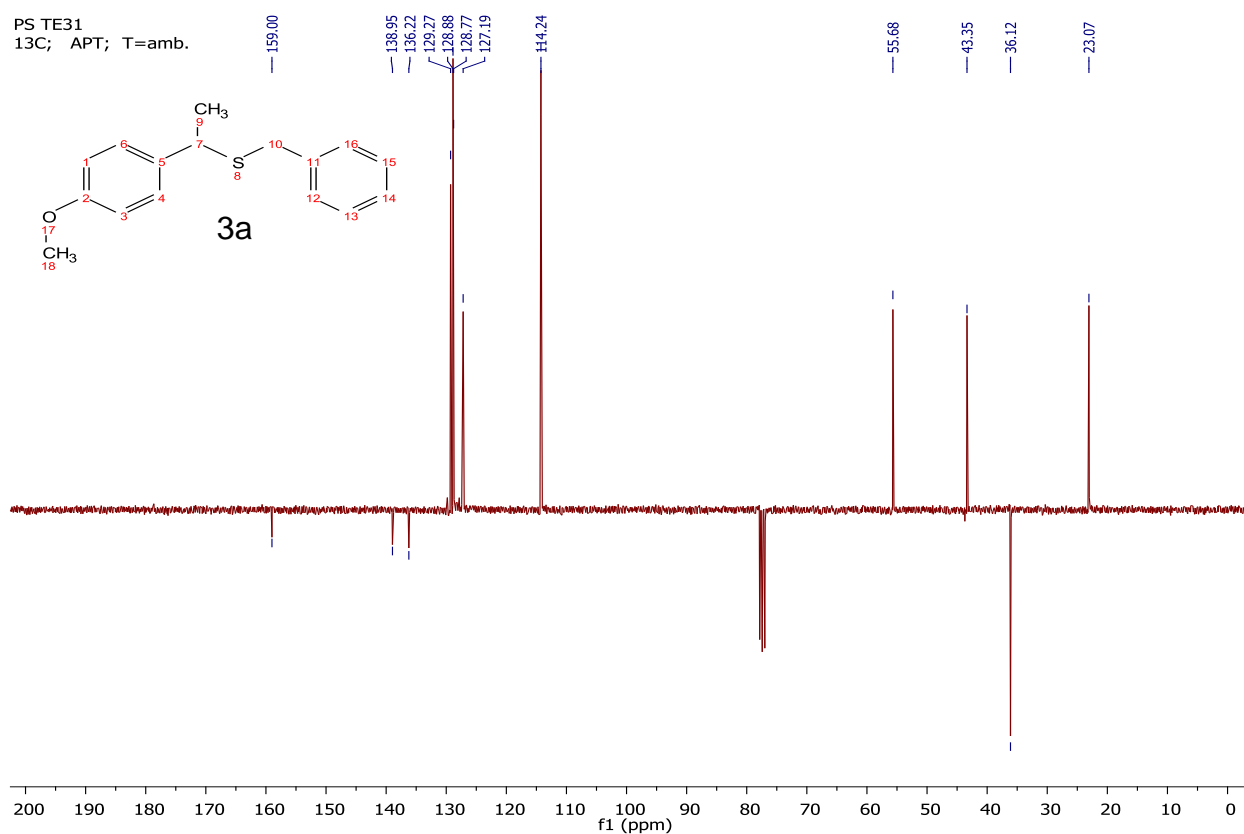

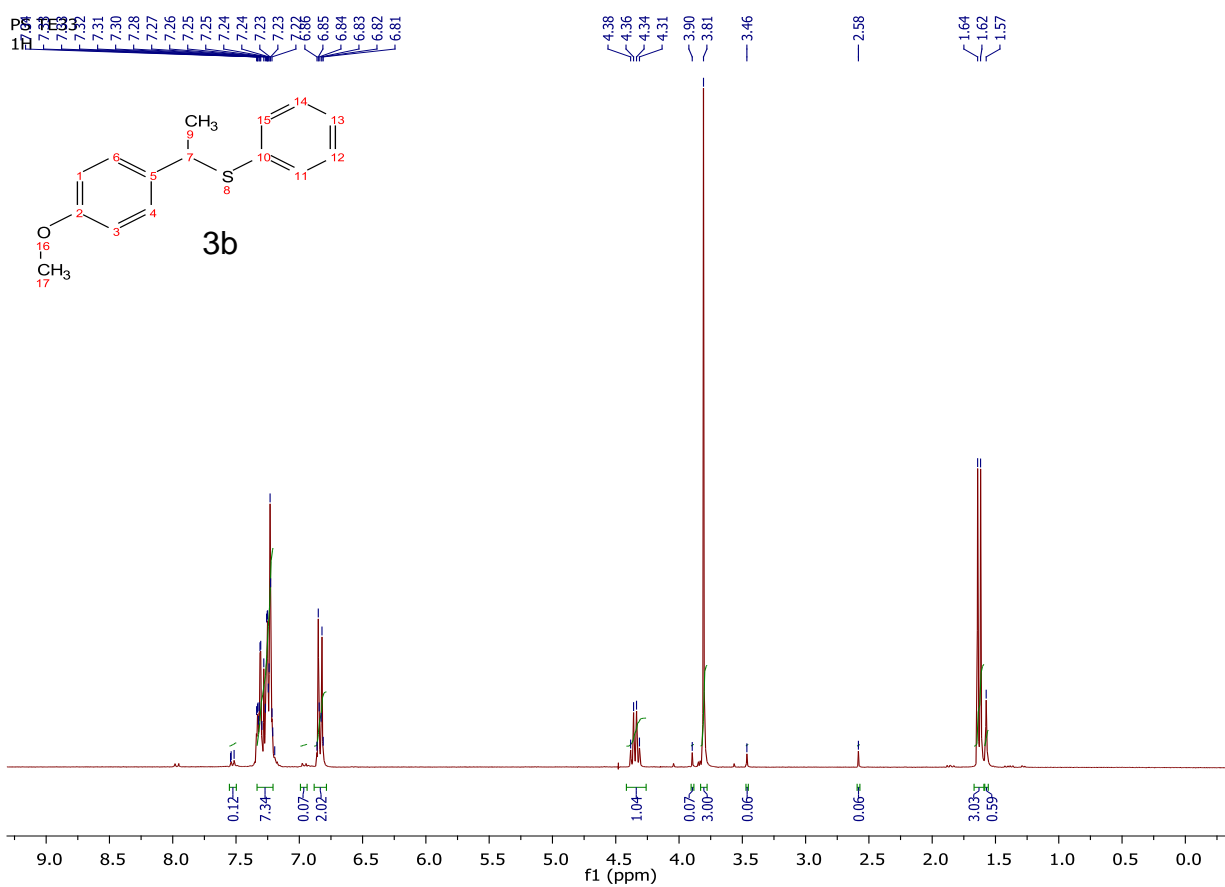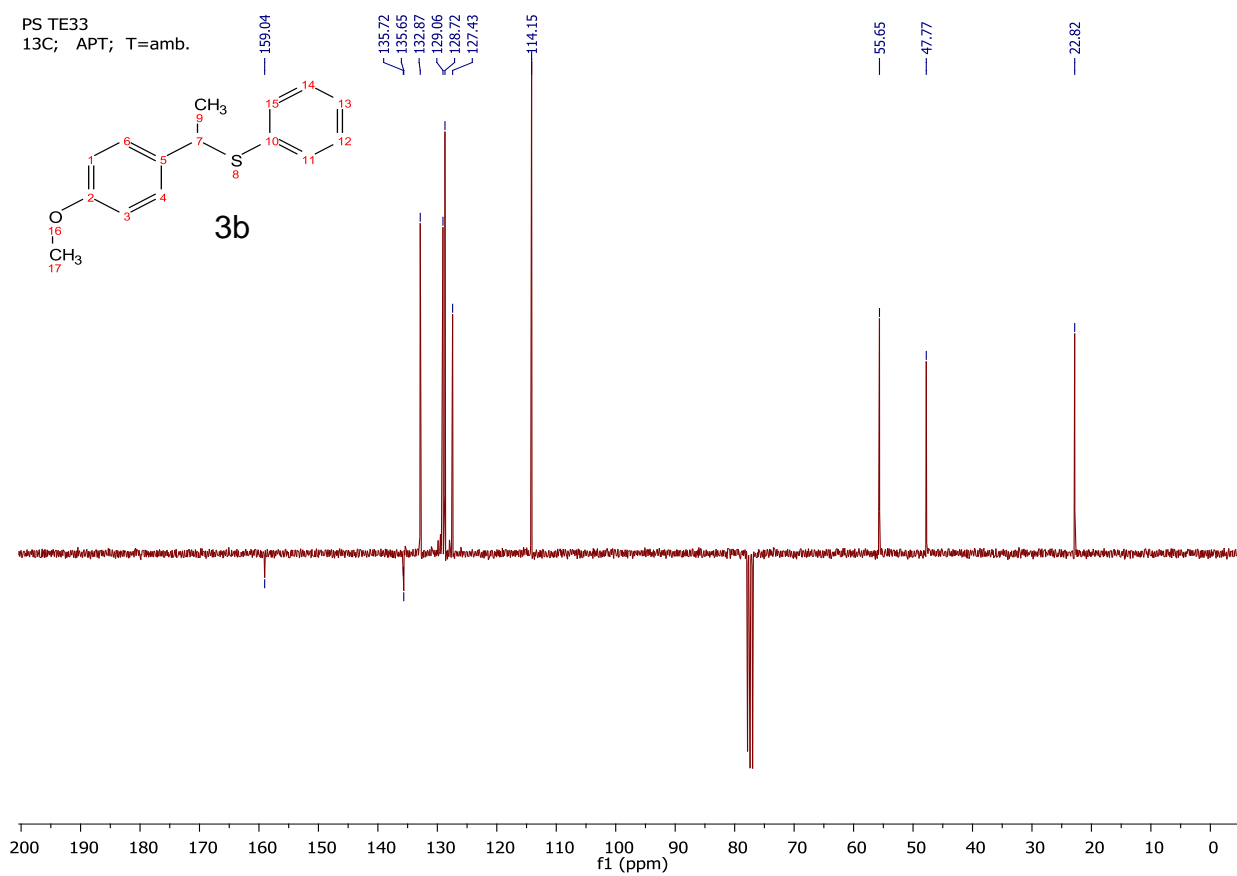

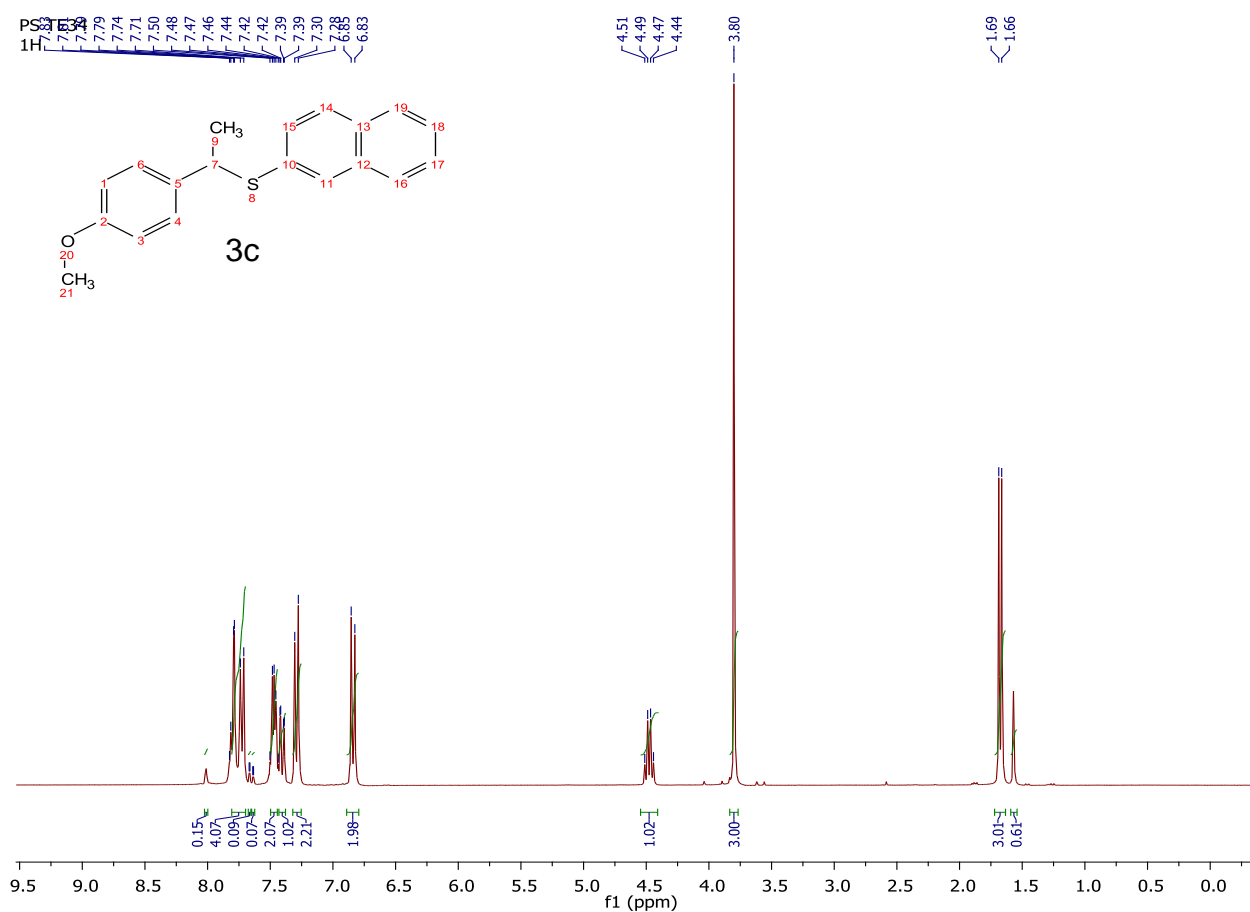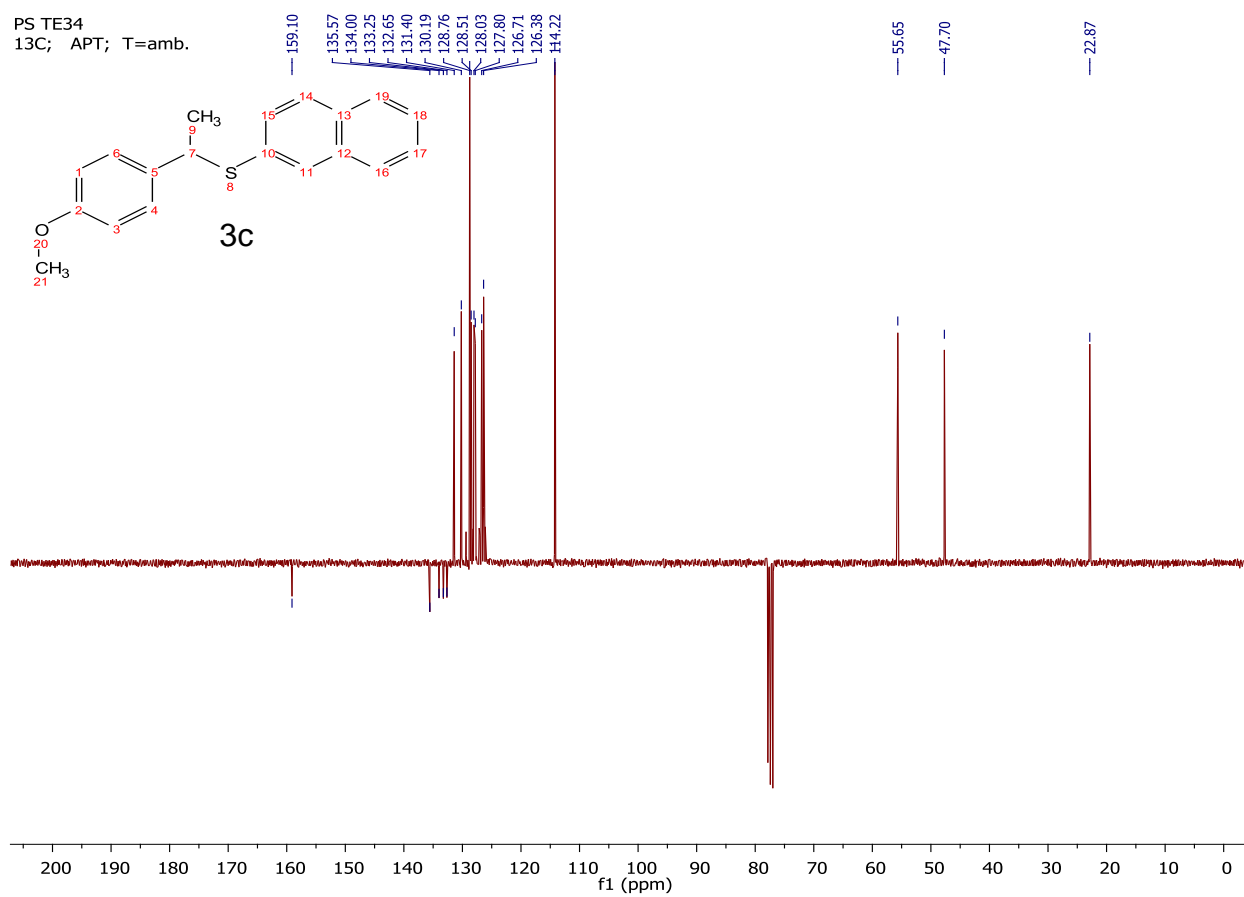

PS TE32  
1H

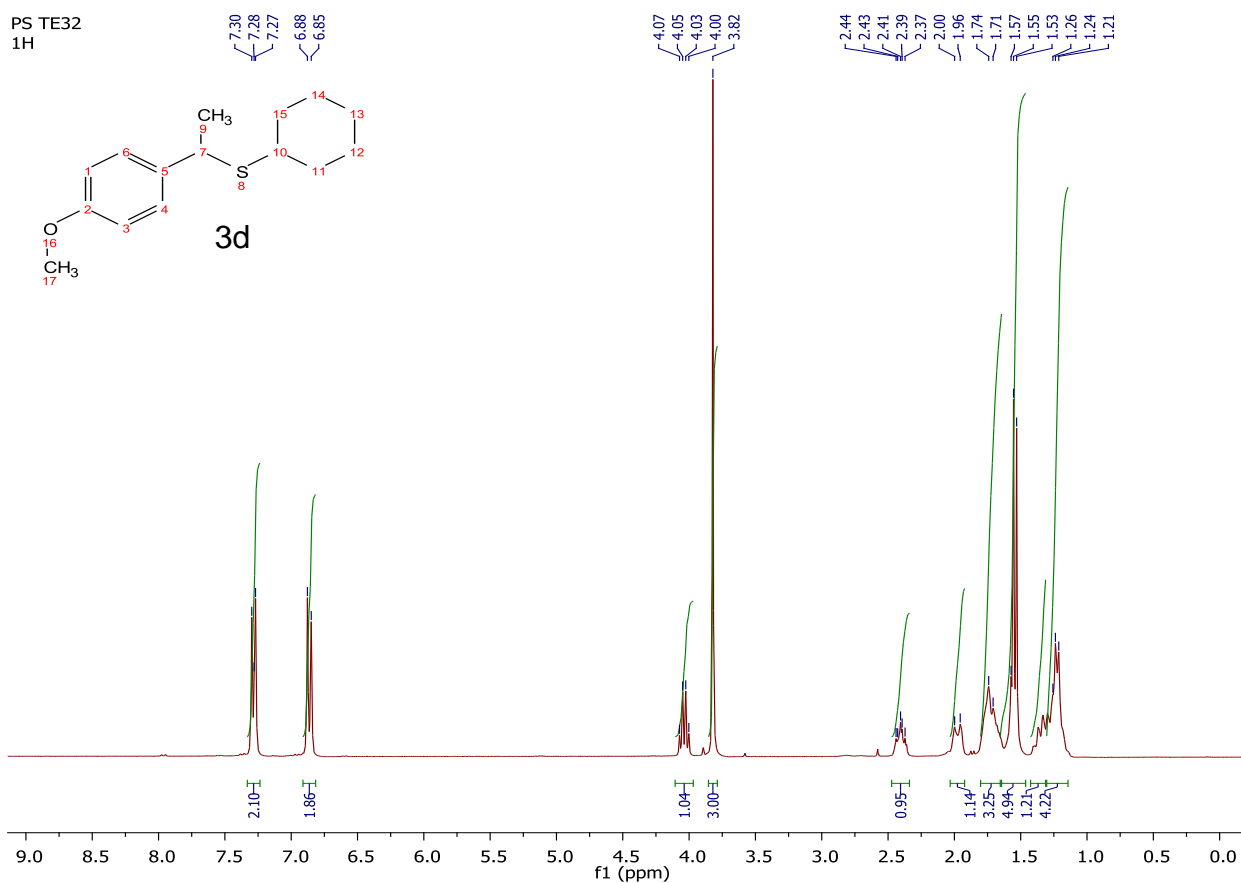

PS TE32  
13C; APT; T=amb.

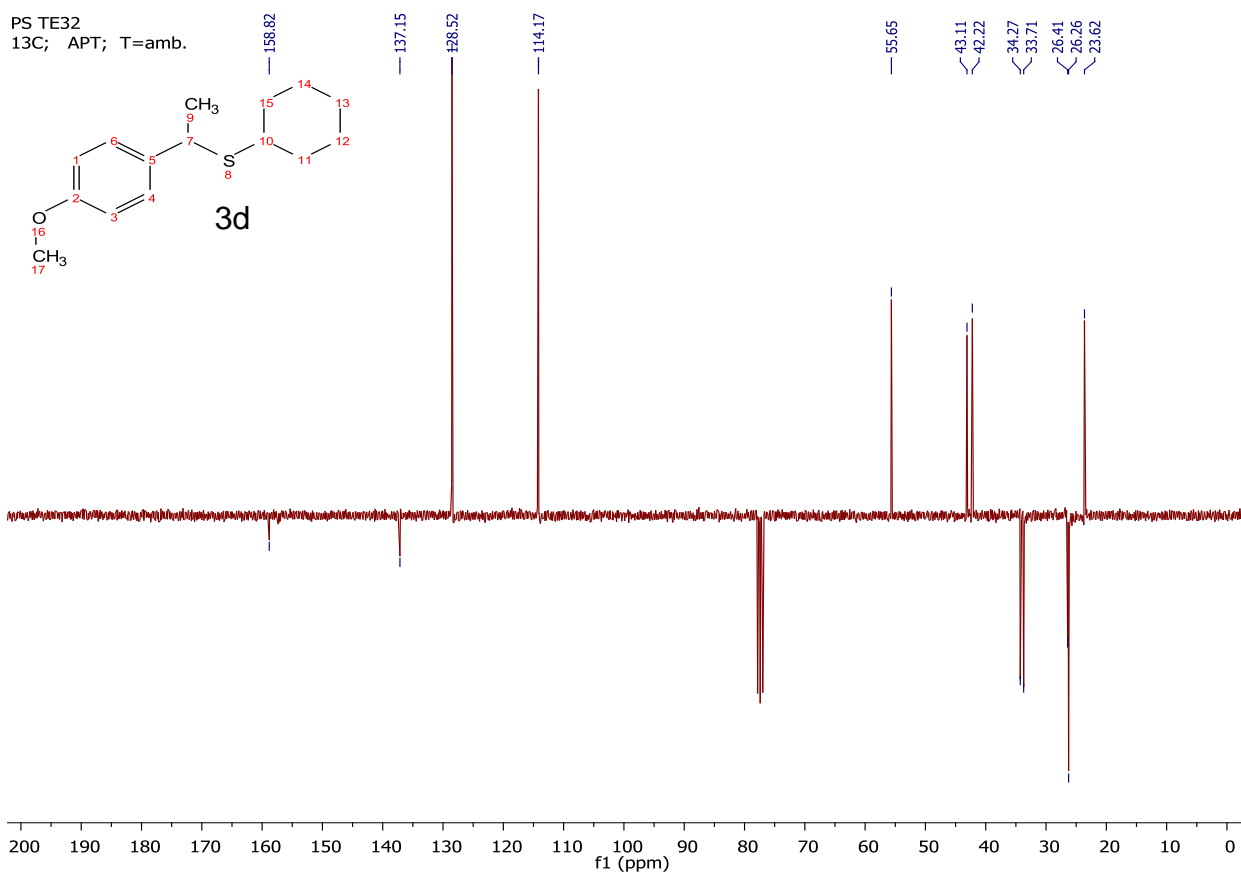

PS TE 37  
1H

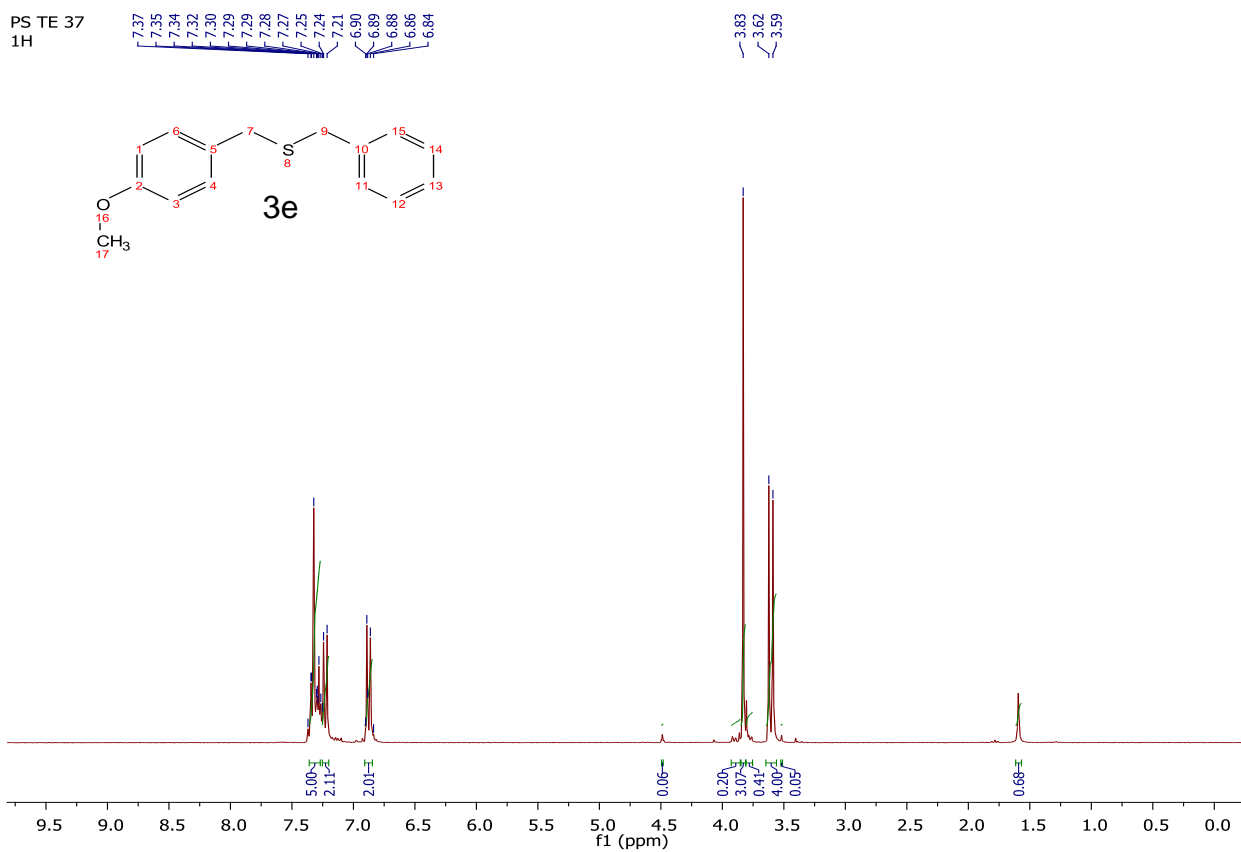

PS TE 37  
13C; APT; T=amb.

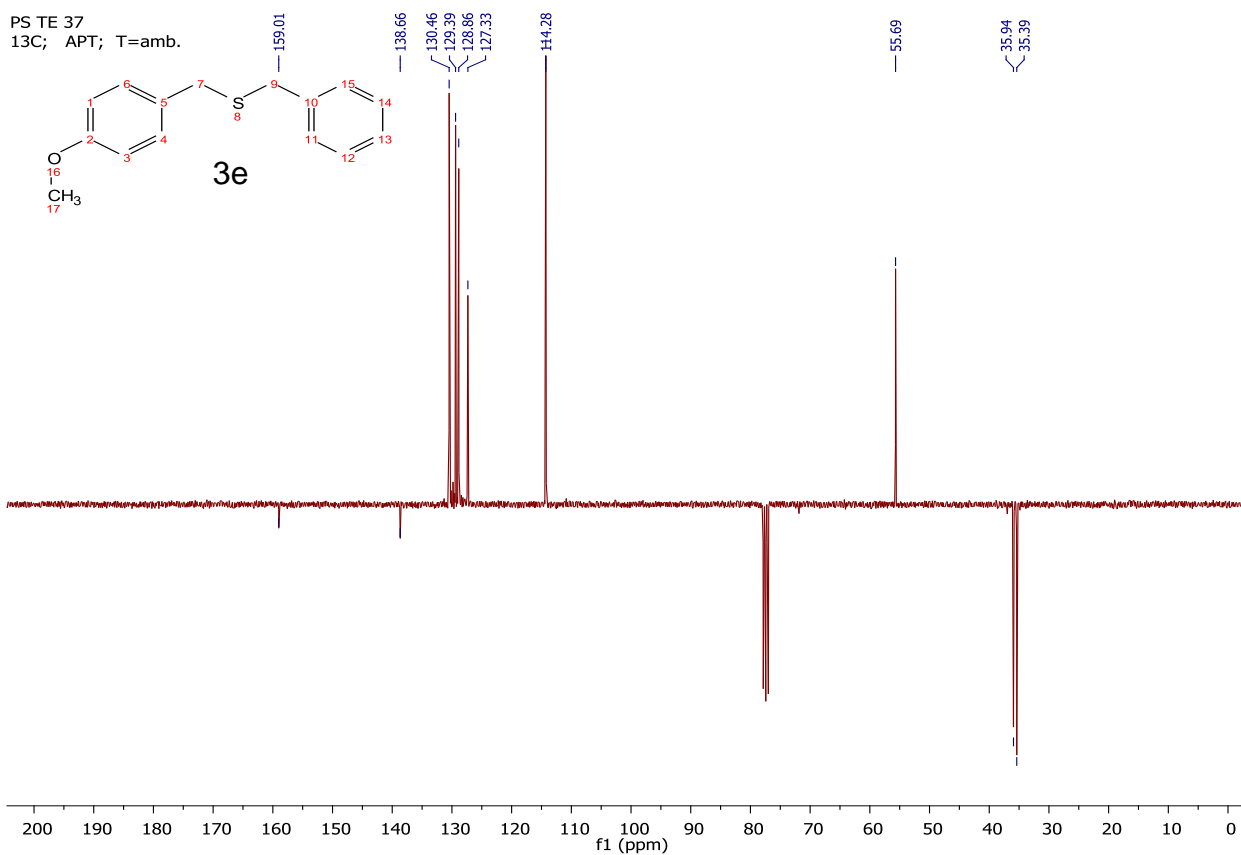



PS TE46\_P  
1H

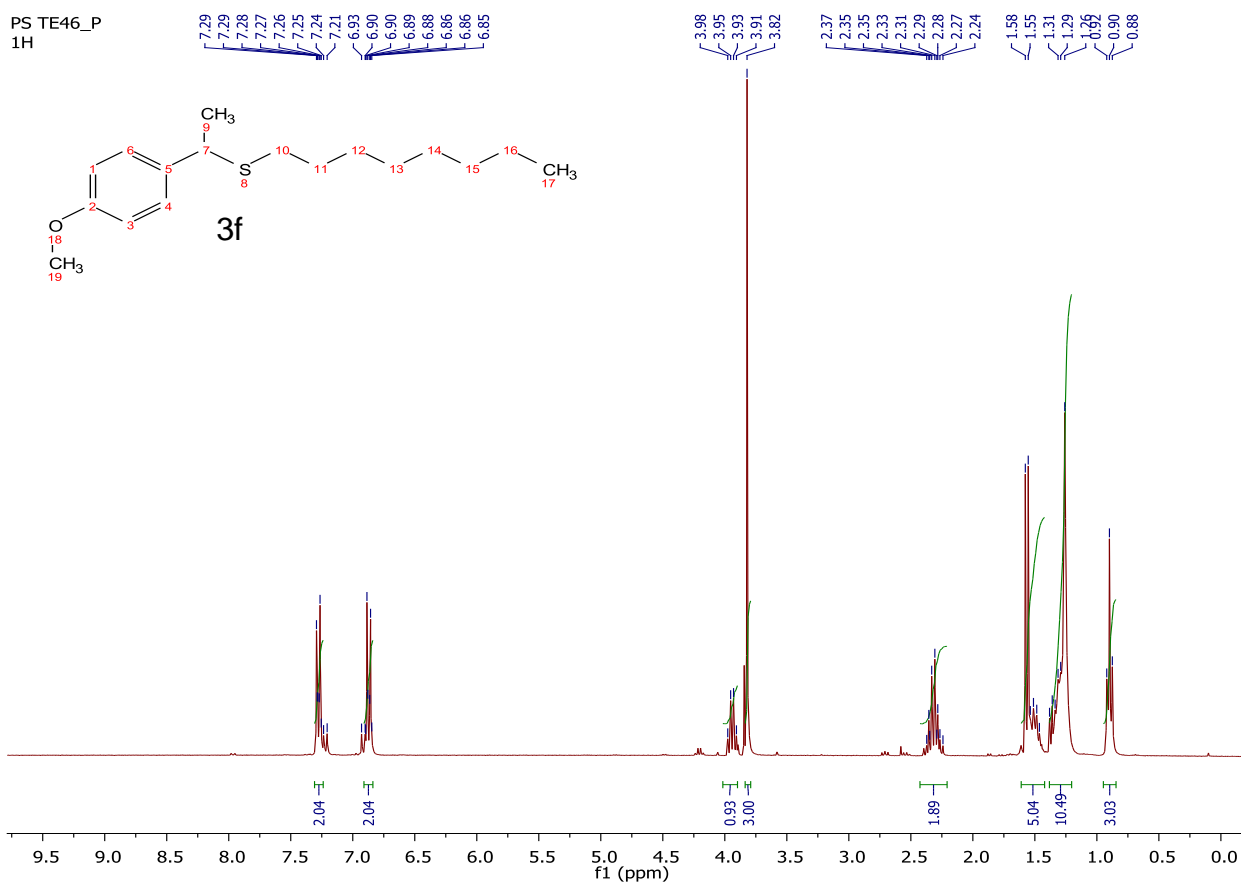

PS TE46\_P  
13C {1H}; ZGDC; T=amb.

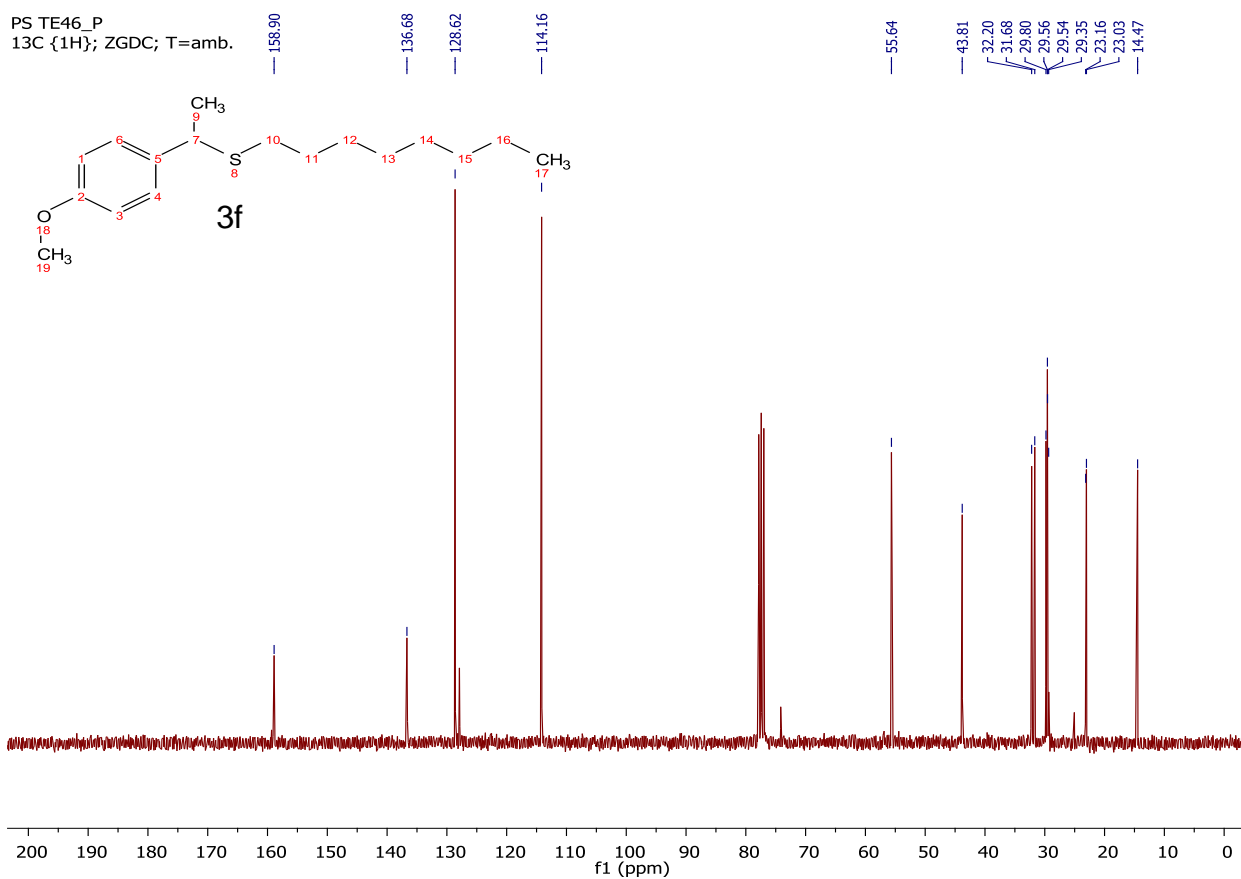

PS TE52  
1H

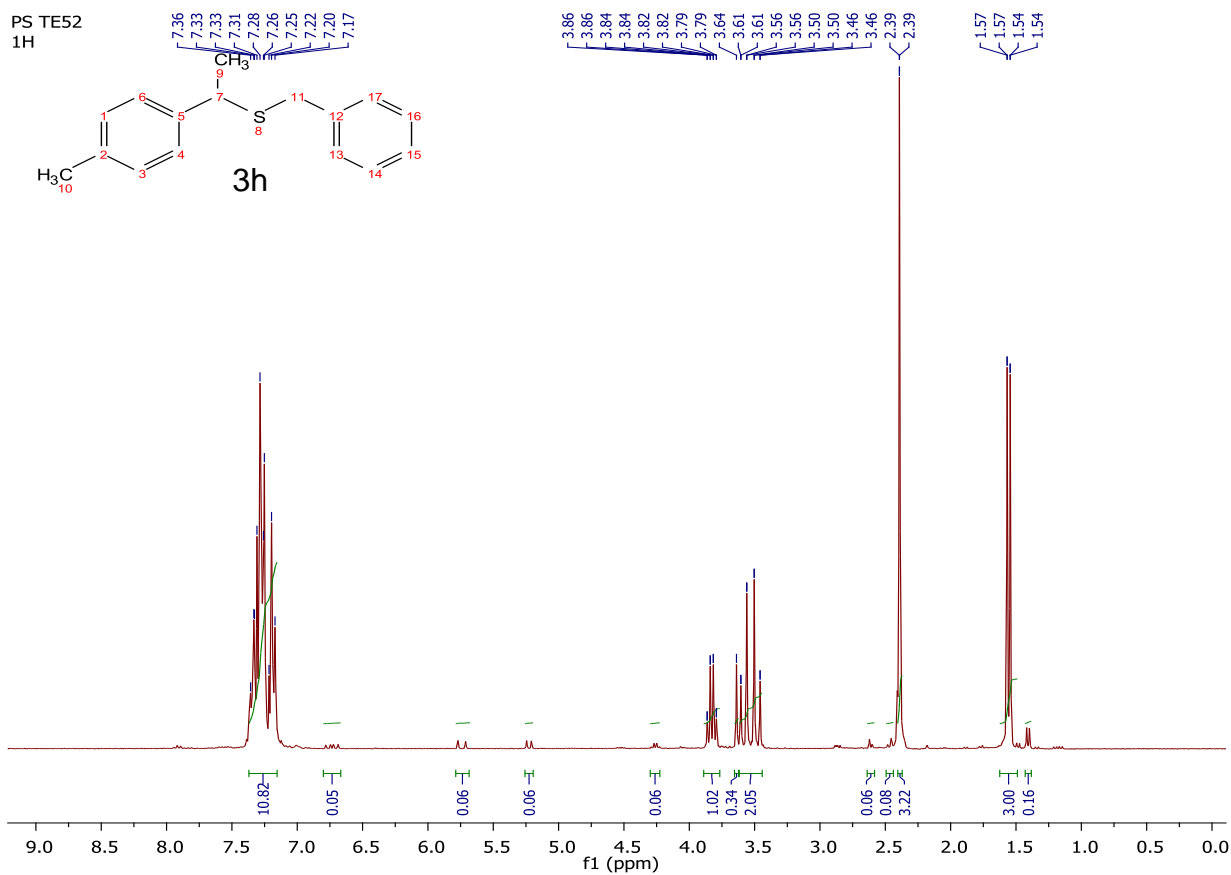

PS TE52  
13C; APT; T=amb.

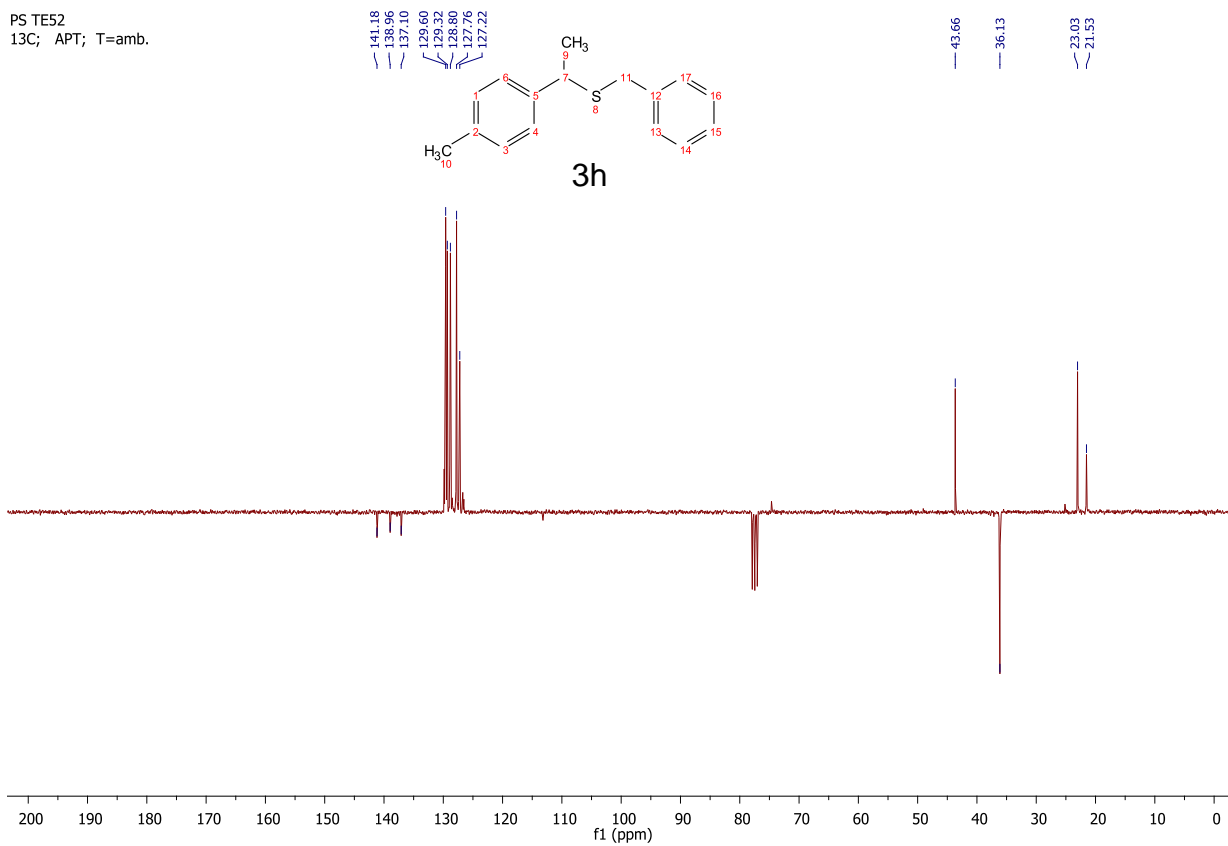

PS TE51  
1H

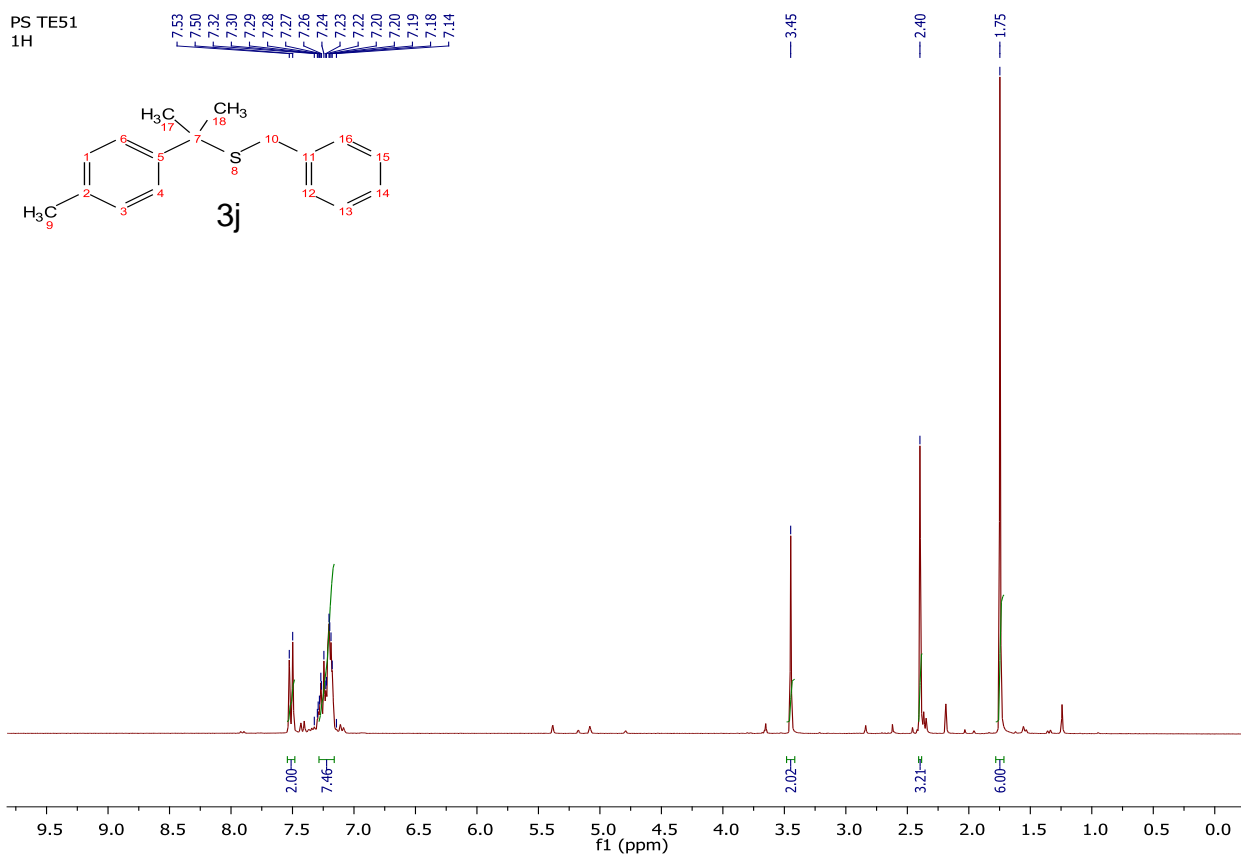

PS TE51  
13C {1H}; ZGDC; T=amb.

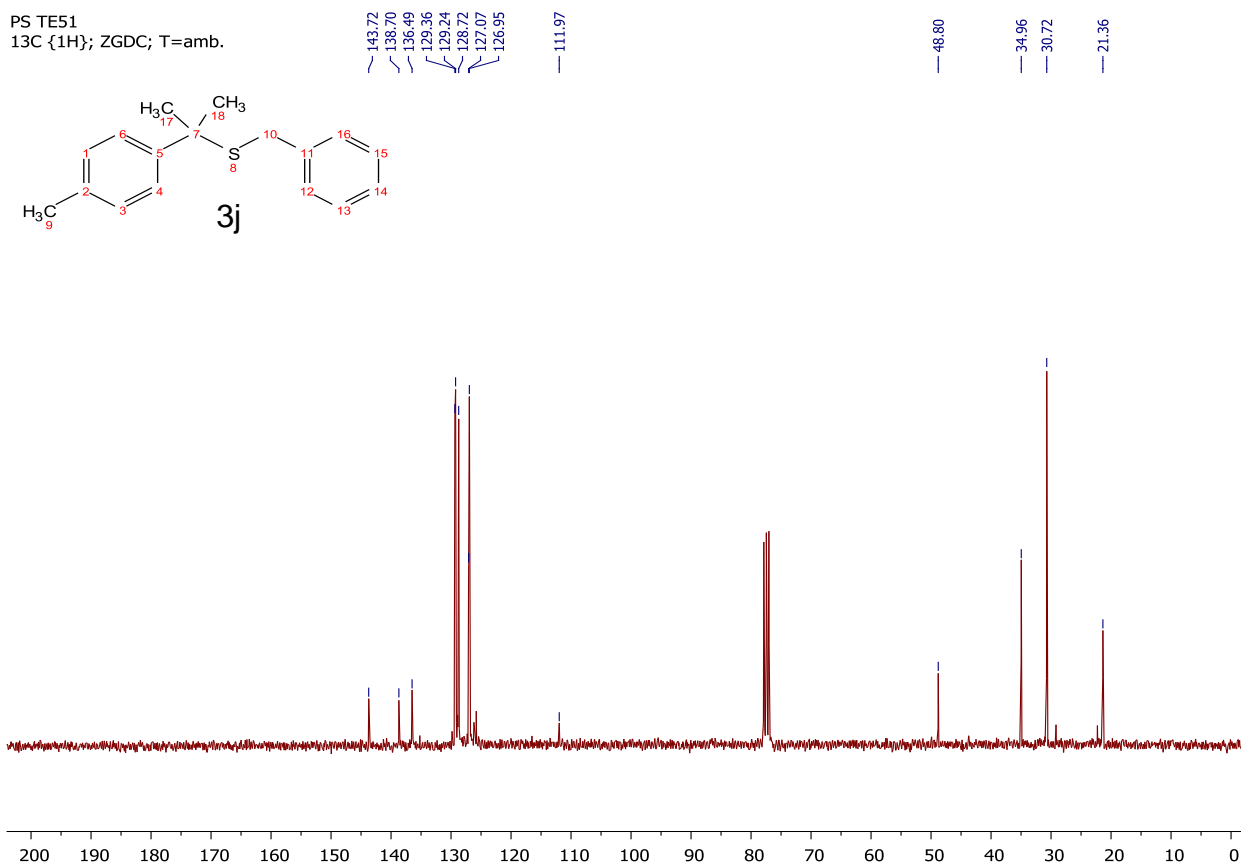

## Copies of mass spectra

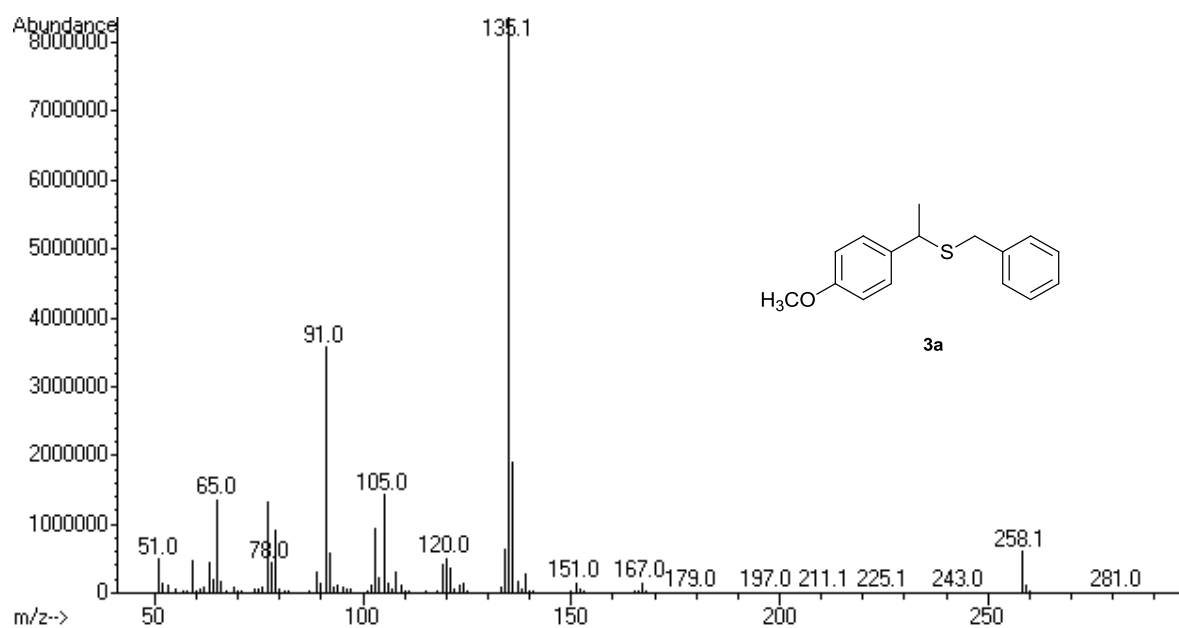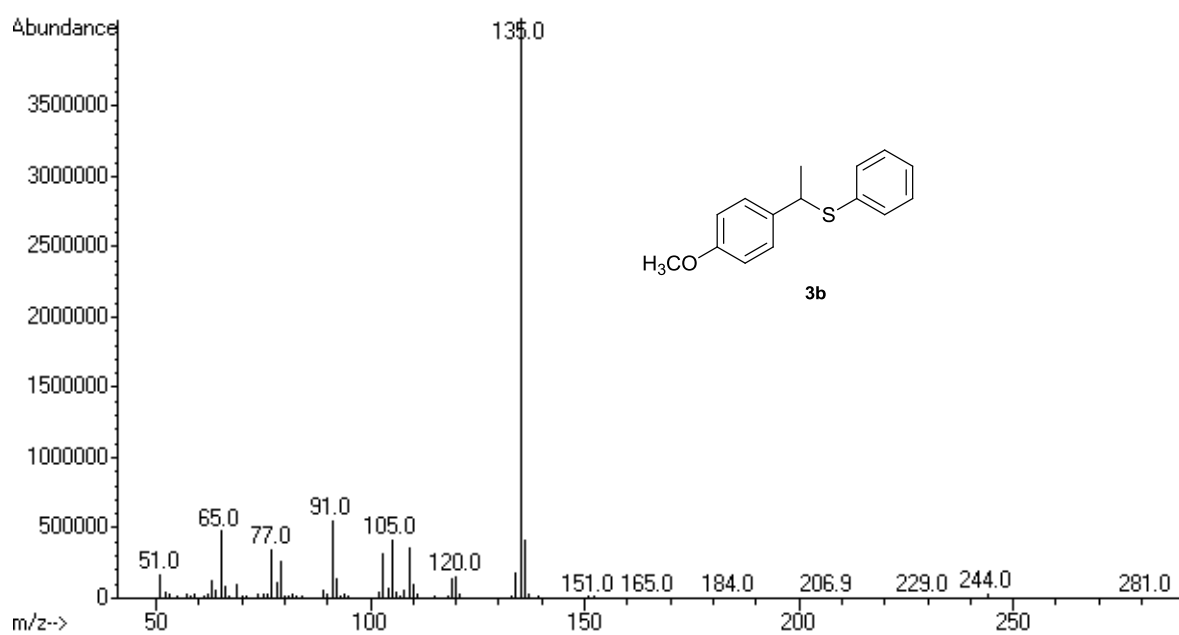

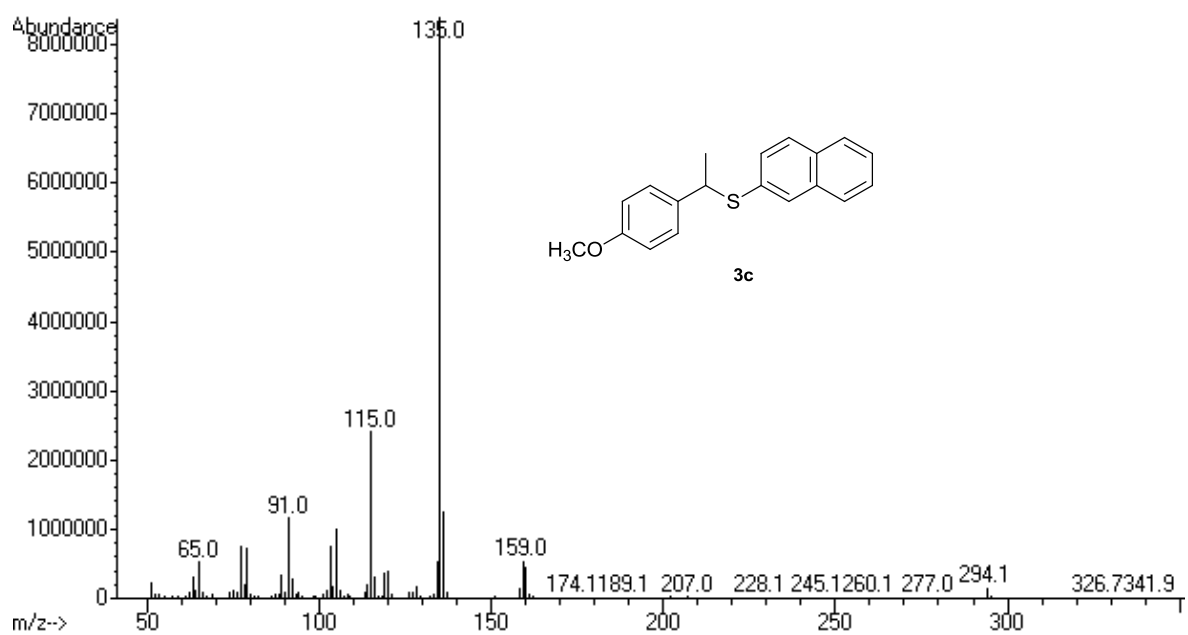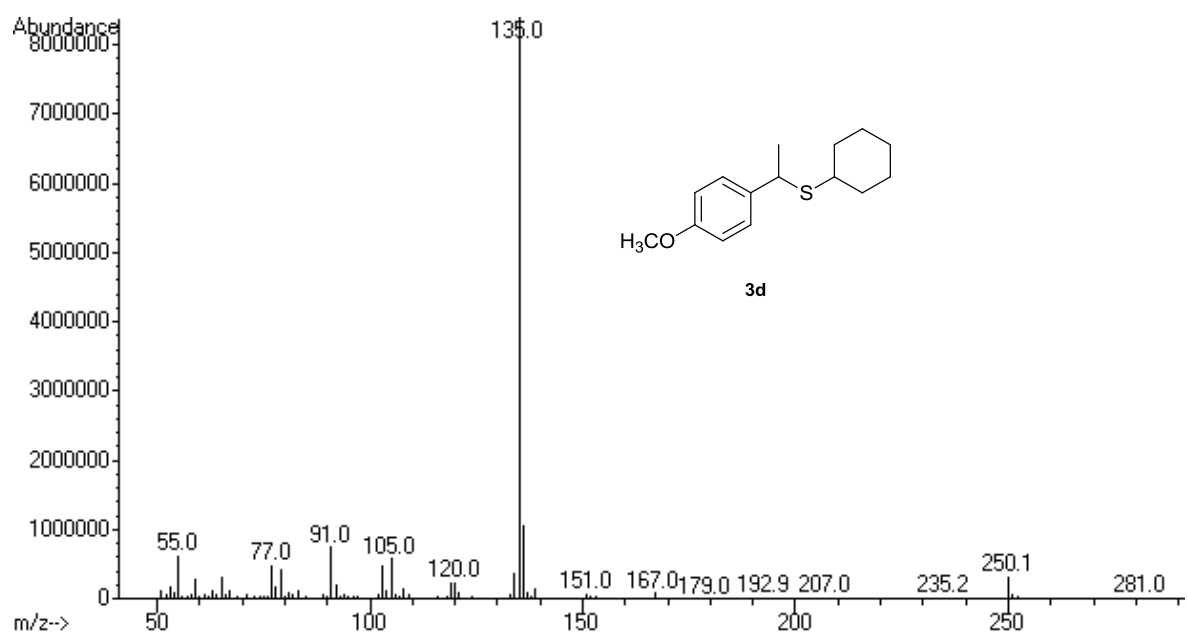

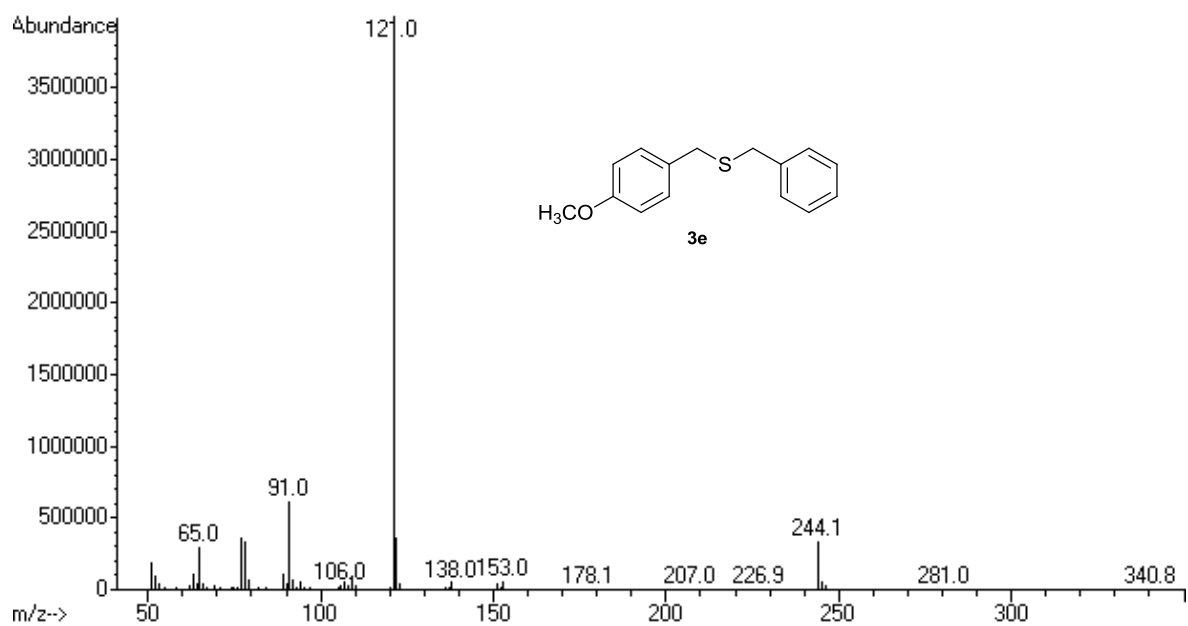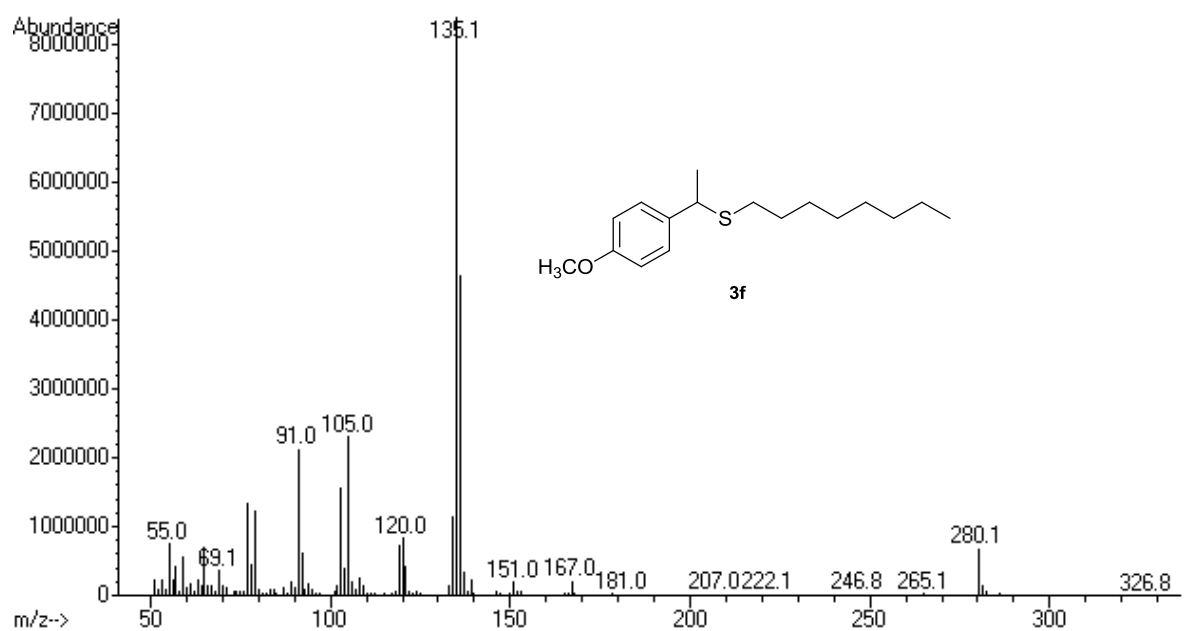

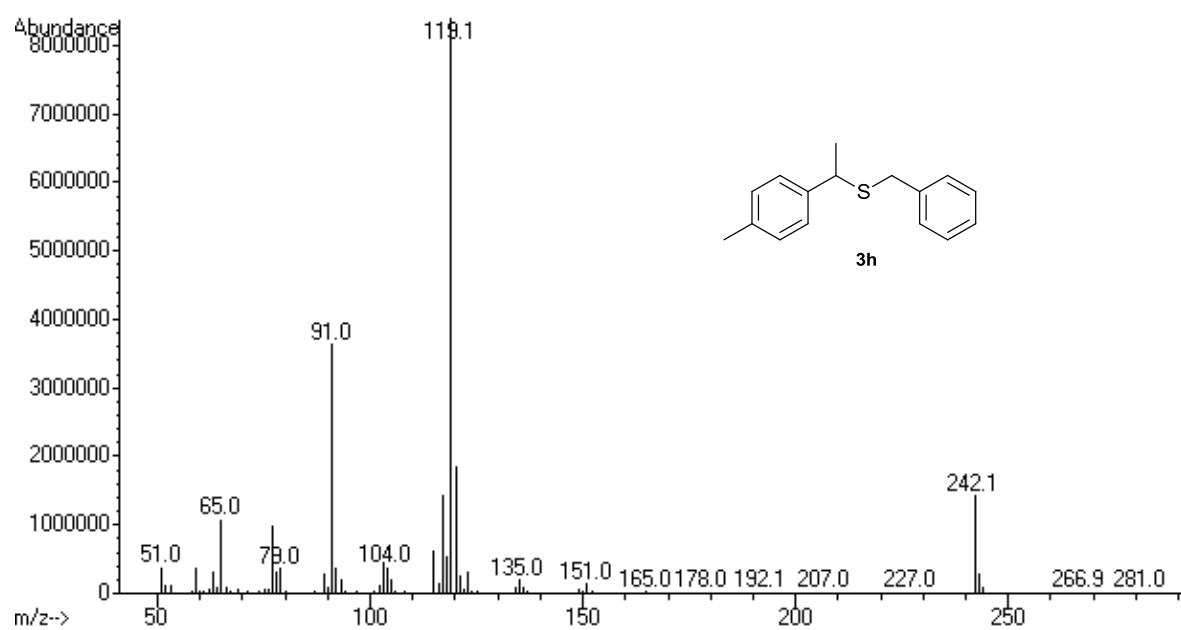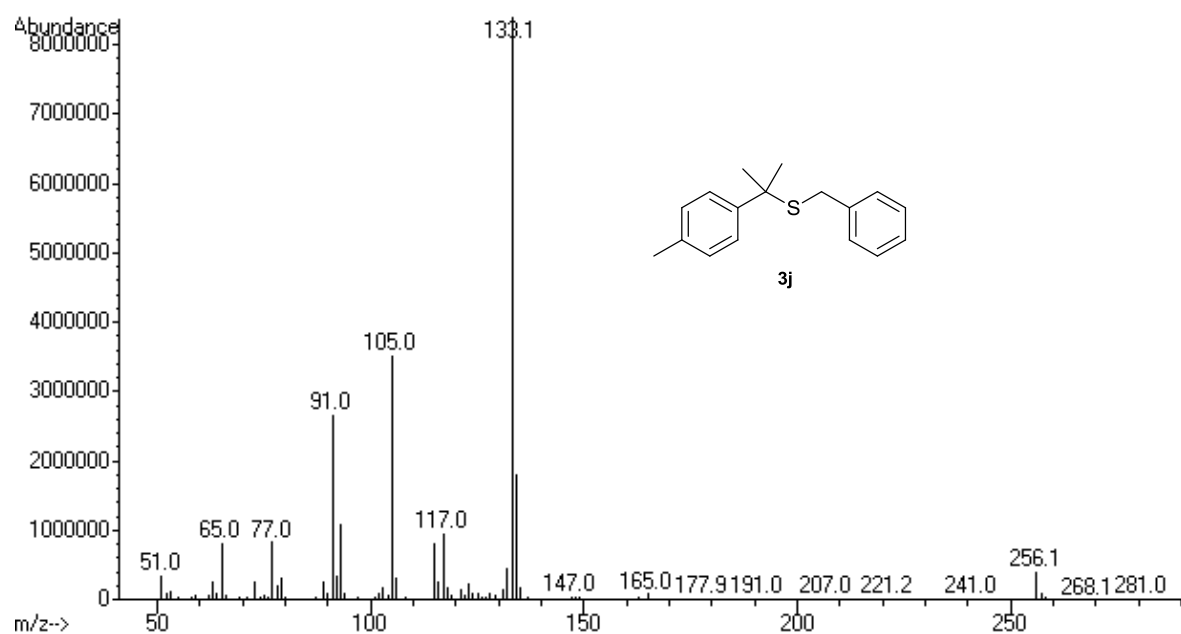

## Optical Rotatory Power Determination

Optical rotatory power of (*R*)-1-phenylethanol and benzyl(1-phenylethyl)sulfane (**3q**) ethanol solutions were measured on a Jasco P-2000 digital polarimeter operating at the sodium D line with a 100 mm path length cell.

(*R*)-1-phenylethanol measured  $[\alpha]_D^{21^\circ C}$  ( $c = 0.05$ , EtOH) = +45.6).

benzyl(1-phenylethyl)sulfane (**3q**) measured  $[\alpha]_D^{21^\circ C}$  ( $c = 0.004$ , EtOH) = -0.65).
